# Supplementary material for: Maguari Virus Associated with Human Disease
Source: PubMed Central journal article supplement (PMC5547800; doi:10.3201/eid2308.161254), 2017-08
Supplement: 16-1254-Techapp-s1.pdf [file 16-1254-Techapp-s1.pdf]

# Maguari Virus Associated with Human Disease

## Technical Appendix

**Technical Appendix Table 1.** Source and sequence information for virus strains sequenced in this study

| Virus/strain                 | Host                                     | Year | Location                                  | GenBank accession no.                     |
|------------------------------|------------------------------------------|------|-------------------------------------------|-------------------------------------------|
| Maguari virus                |                                          |      |                                           |                                           |
| BeAr 7272 prototype          | Mixed mosquito pool*                     | 1957 | Utinga forest, Pará, Brazil               | S: KX100103<br>M: KX100104<br>L: KX100105 |
| CoAr 3363                    | <i>Aedes scapularis</i>                  | 1964 | Buenaventura, Valle del Cauca, Colombia   | S: KX100106<br>M: KX100107<br>L: KX100108 |
| CbaAr 426                    | <i>Ae. albifasciatus</i>                 | 1965 | Córdoba, Argentina                        | S: KX100109<br>M: KX100110<br>L: KX100111 |
| AG83–1746                    | <i>Psorophora varinervis</i>             | 1982 | Calchaquí Forest, Santa Fe, Argentina     | S: KX100112<br>M: KX100113<br>L: KX100114 |
| Maguari-like virus: OBS 6657 | Human                                    | 1998 | Pucallpa, Ucayali, Peru                   | S: KX100115<br>M: KX100116<br>L: KX100117 |
| Tlacotalpan virus: 61D240    | <i>Mansonia titillans</i>                | 1961 | Tlacotalpan, Veracruz, Mexico             | S: KX100118<br>M: KX100119<br>L: KX100120 |
| Playas virus                 |                                          |      |                                           |                                           |
| 75V3066                      | <i>Ae. taeniorhynchus</i>                | 1975 | Playas, Ecuador                           | S: KX100121<br>M: KX100122<br>L: KX100123 |
| 75V5938                      | <i>Aedeomyia (ochler) taeniorhynchus</i> | 1975 | Guayaquil, Ecuador                        | S: KX100124<br>M: KX100125<br>L: KX100126 |
| 75V5758                      | <i>Aedeomyia (ochler) taeniorhynchus</i> | 1975 | La Florida, Ecuador                       | S: KX100127<br>M: KX100128<br>L: KX100129 |
| Fort Sherman virus: 86MSP18  | Human                                    | 1985 | Fort Sherman, Panama                      | S: KX100130<br>M: KX100131<br>L: KX100132 |
| Cache Valley virus           |                                          |      |                                           |                                           |
| 6V633 prototype              | <i>Culiseta inornata</i>                 | 1956 | Cache Valley (near Wellsville), Utah, USA | S: KX100133<br>M: KX100134<br>L: KX100135 |
| W728–67                      | <i>Ae. communis</i>                      | 1967 | Mazomanie, Wisconsin, USA                 | S: KX100136<br>M: KX100137<br>L: KX100138 |
| W308–67                      | <i>Ae. trivittatus</i>                   | 1967 | Wyalusing, Wisconsin, USA                 | S: KX100139<br>M: KX100140<br>L: KX100141 |
| MPB1–1551                    | <i>Psorophora confinnis</i>              | 1971 | Palo Blanco, Tamaulipas, Mexico           | S: KX100142<br>M: KX100143<br>L: KX100144 |
| CK-102                       | Sheep (sentinel)                         | 1980 | San Angelo, Texas, USA                    | S: KX100145<br>M: KX100146<br>L: KX100147 |
| MI80–1-450                   | Horse                                    | 1980 | Cass County, Michigan, USA                | S: KX100148<br>M: KX100149<br>L: KX100150 |
| WI-03BS7669                  | Human                                    | 2003 | Wisconsin, USA                            | S: KX100151                               |

| Virus/strain | Host | Year | Location | GenBank accession no. |
|--------------|------|------|----------|-----------------------|
|              |      |      |          | M: KX100152           |
|              |      |      |          | L: KX100153           |

\*Contained *Aedes scapularis*, *Ae serratus*, *Ae sexlineatus*, *Mansonia* spp. and *Psorophora ferox*.

**Technical Appendix Table 2.** GenBank accession numbers for reference orthobunyavirus sequences used in the phylogenetic analyses

| Group/virus        | Strain              | GenBank accession nos. |           |           |
|--------------------|---------------------|------------------------|-----------|-----------|
|                    |                     | S segment              | M segment | L segment |
| Bunyamwera         |                     |                        |           |           |
| Abbey Lake virus   | Cu20-XJ             | KJ710424               | KJ710423  | KJ710425  |
| Batai virus        | MM2222              | JX846595               | JX846596  | JX846597  |
|                    | 8627-11             | FJ436802               | FJ436799  |           |
|                    | 804922              | FJ436805               |           |           |
|                    | 804986              | FJ436803               | FJ436798  |           |
|                    | 804988              | FJ436800               | FJ436804  |           |
|                    | IG 20217 (Chittoor) | JX846598               | JX846599  | JX846600  |
|                    | Italy-2009          | KC168046               | KC168047  | KC168048  |
|                    | NM-12               | KJ187040               | KJ187039  | KJ187038  |
|                    | ON-1-E-94           | AB257761               | AB257764  |           |
|                    | ON-7-B-01           | AB257762               | AB257765  |           |
|                    | UgMP6830            | JX846601               | JX846602  | JX846603  |
|                    | XQ-B                | KJ398936               |           |           |
|                    | MS50                | JX846604               | JX846605  | JX846606  |
|                    | Calovo 134          | KJ542624               | KJ542625  | KJ542626  |
|                    | Calovo 184          |                        | DQ334335  |           |
|                    | Calovo 8020         | KJ542630               | KJ542631  | KJ542632  |
|                    | Calovo 8040         | KJ542633               | KJ542634  | KJ542635  |
|                    | Calovo JAn MS3      | KJ542627               | KJ542628  | KJ542629  |
| Birao virus        | ArB2198             | AM711131               |           |           |
| Bozo virus         | ArB13529            | AM711132               |           |           |
| Bunyamwera virus   | Original            | NC_001927              | NC_001926 | NC_001925 |
|                    | ArB28215            | AM711130               |           |           |
|                    | ArB29051            | AM709778               |           |           |
| Cache Valley virus | MNZ-92011           | KC436108               | KC436107  | KC436106  |
|                    | 002                 | GU018033               |           |           |
|                    | 6V633               |                        | AF082576  |           |
|                    | 69V2152             | KP835919               |           |           |
|                    | 078                 | GU018034               |           |           |
|                    | 213                 | GU018035               |           |           |
|                    | 390                 | GU018036               |           |           |
|                    | 478                 | GU018037               |           |           |
|                    | 3178                | KP835920               |           |           |
|                    | 9078                | KP835921               |           |           |
|                    | 9122                | KP835922               |           |           |
|                    | 9548                | KP835930               |           |           |
|                    | 9627                | KP835923               |           |           |
|                    | 10032               | KP835931               |           |           |
|                    | 10081               | KP835932               |           |           |
|                    | 10311               | KP835933               |           |           |
|                    | 10625               | KP835924               |           |           |
|                    | 10767               | KP835934               |           |           |
|                    | 10951               | KP835935               |           |           |
|                    | 12219               | KP835936               |           |           |
|                    | 14745               | KP835928               |           |           |
|                    | 16924               | KP835929               |           |           |
|                    | CK-102              |                        | AF186242  |           |
|                    | CtAr560-79          | KP835925               |           |           |
|                    | MI80-1-450          |                        | AF186241  |           |
|                    | MN550               | KP835926               |           |           |
|                    | NJ3542-10           | KF296339               |           |           |
|                    | NJ7310-10           | KF296340               |           |           |
|                    | NJ7454-10           | KF296341               |           |           |
|                    | RU68                | KP835927               |           |           |
|                    | W8491               | KP835937               |           |           |
| Cholul virus       | MEX-07              | EU879062               | JN808310  |           |
| Fort Sherman virus | 86MSP18             | EU564829               |           |           |

| Group/virus                         | Strain       | GenBank accession nos. |           |           |
|-------------------------------------|--------------|------------------------|-----------|-----------|
|                                     |              | S segment              | M segment | L segment |
| Germiston virus                     | SAAr1050     | M19420                 | M21951    |           |
| Ilesha virus                        | 8e           | KC608151               | KC608150  | KC608149  |
|                                     | R5964        | AY729651               | KF234074  | KF234075  |
|                                     | KO/2         |                        | AY859372  |           |
|                                     | ArB16282     | AM709780               |           |           |
|                                     | HB80P125     | AM709779               |           |           |
| Kairi virus                         | MEX-07       | EU879063               | GQ118699  |           |
|                                     | TRVL8900     | X73467                 | EU004186  |           |
| Maguari virus                       | BeAr7272     | D13783                 | AY286443  |           |
| Main Drain virus                    | BFS5015      | X73469                 | EU004187  |           |
| Mboke virus                         | DakArY357    | AY593727               |           |           |
| M'Poko virus                        | ArB365       | AM711133               |           |           |
| Nola virus                          | ArB2882      | AM711134               |           |           |
| Ngari virus                         | 9800521      | JX857325               | JX857326  | JX857327  |
|                                     | 9800535      | JX857328               | JX857329  | JX857330  |
|                                     | Adrar        | KJ716848               | KJ716849  | KJ716850  |
|                                     | DaKArD28542  | JX857316               | JX857317  | JX857318  |
|                                     | GSA-TS7-5170 | KM507341               | KM514677  | KM507336  |
|                                     | SUD HKV66    | JX857319               | JX857320  | JX857321  |
|                                     | SUD HKV141   | JX857322               | JX857323  | JX857324  |
|                                     | ISL-TS2-5242 | KM507342               | KM514678  | KM507334  |
|                                     | TND-S1-19801 | KM507343               | KM514679  | KM507335  |
| Northway virus                      | 0234         | X73470                 | EU004188  |           |
| Playas virus                        | 75V3066      | KP83593                |           |           |
| Potosi virus                        | 89-3380      | AY729652               | EU004189  |           |
| Shokwe virus                        | SAAr4042     | EU564831               |           |           |
| Tensaw virus                        | TSV-FL06     | FJ943507               | FJ943506  | FJ943509  |
| Wyeomyia/Anhembu                    |              |                        |           |           |
| Anhembu virus                       | SPAr2984     | JN572064               | JN572063  | JN572062  |
| Cachoeira Porteira virus            | BeAr328208   | JN968592               | JN968591  | JN968590  |
| Iaco virus                          | BeAr314206   | JN572067               | JN572066  | JN572065  |
| Macaua virus                        | BeAr306329   | JN572070               | JN572069  | JN572068  |
| Sororoca virus                      | BeAr32149    | JN572073               | JN572072  | JN572071  |
| Taiassui virus                      | BeAr671      | JN572076               | JN572075  | JN572074  |
| Tucunduba virus                     | BeAr278      | JN572079               | JN572078  | JN572077  |
| Wyeomyia virus                      | Original     | JN572082               | JN572081  | JN572080  |
|                                     | TRVL8349     | JN801033               | JN801034  | JN801035  |
|                                     | Darien       | JN801036               | JN801037  | JN801038  |
| Guaroa virus                        |              |                        |           |           |
|                                     | ASA1165      | KM245552               | KM245553  | KM245554  |
|                                     | BeH22063     | KM245522               | KM245523  | KM245524  |
|                                     | CoH352111    | KM245519               | KM245520  | KM245521  |
|                                     | FPI01900     | KM245546               | KM245547  | KM245548  |
|                                     | FSJ2035      | KM245549               | KM245550  | KM245551  |
|                                     | FVB0546      | KM245528               | KM245529  | KM245530  |
|                                     | FVB0840      | KM245537               | KM245538  | KM245539  |
|                                     | FVB0849      | KM245540               | KM245541  | KM245542  |
|                                     | FVB2032      | KM245543               | KM245544  | KM245545  |
|                                     | IQD8537      | KM245525               | KM245526  | KM245527  |
|                                     | MIS0239      | KM245534               | KM245535  | KM245536  |
|                                     | OBT5637      | KM245531               | KM245532  | KM245533  |
| California encephalitis (outgroup): | Human-78     | NC_004110              | NC_004109 | NC_004108 |
| LaCrosse virus                      |              |                        |           |           |

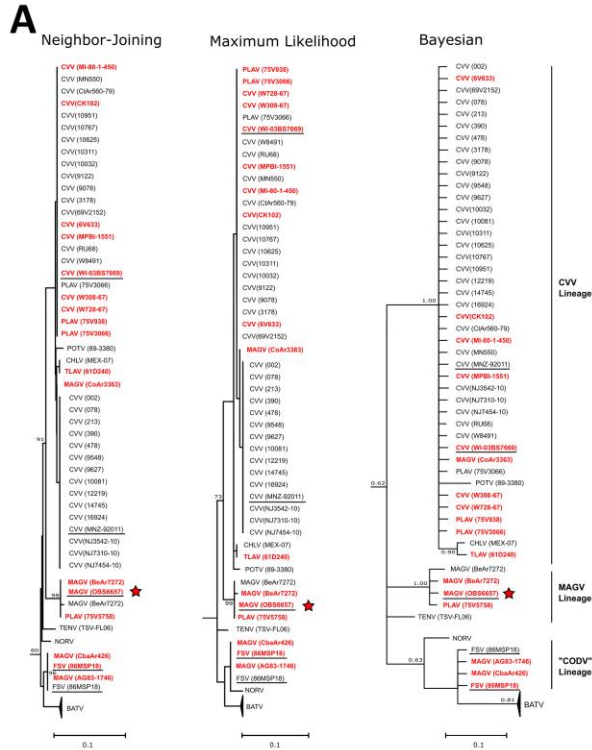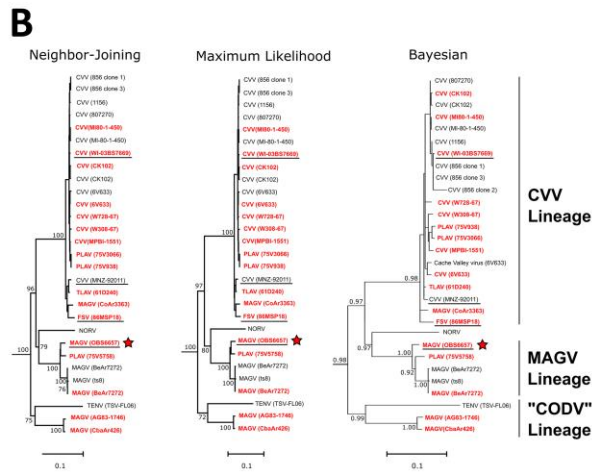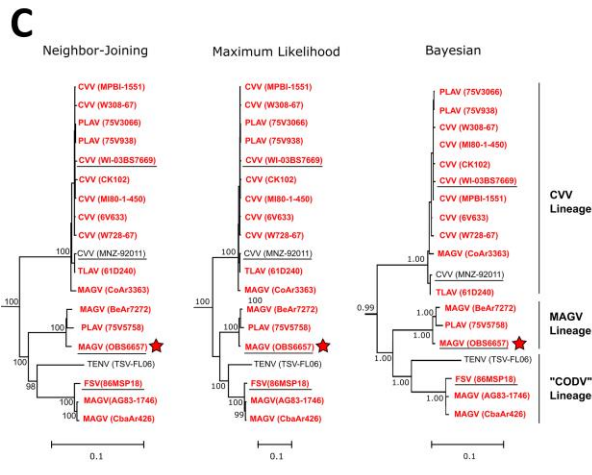

**Technical Appendix Figure 1.** Comparison of phylogenetic analyses of (A) nucleoprotein, (B) glycoprotein, and (C) polymerase amino acid sequences generated using various phylogenetic methods and models. Neighbor-joining trees for all 3 segments were generated using the Poisson model with uniform rates. Maximum-likelihood trees were constructed based on the best fitting model for each dataset (i.e., N = JTT+G; GPC = LG+G+I; L = LG+G+I+F). Bootstrap values for both methods were based on 1,000 replicates and are indicated if >60. Analysis by Bayesian inference also used the best fitting model for each dataset (i.e., N = JTT+G; GPC and L = JTT+I+G) and shows posterior probability values >0.60. For clarity, only the portion of the tree containing the sequences generated in this study (i.e., CVV, MAGV, and CODV lineages) are shown, and measures of statistical support for branching within the CVV lineage are omitted. Sequences generated in this study are shown in red and bold. The OBS6657 isolate is indicated with a red star and human-derived isolates are underlined. BATV, Batai virus; CVV, Cache Valley virus; CHLV, Cholul virus; CODV, Córdoba virus; FSV, Fort Sherman virus; MAGV, Maguari virus; MDV, Main Drain virus; NORV, Northway virus; PLAV, Playas virus; POTV, Potosi virus; TLAV, Tlacotalpan virus; TENV, Tensaw virus.

**A**

Neighbor-Joining

Maximum Likelihood

Bayesian

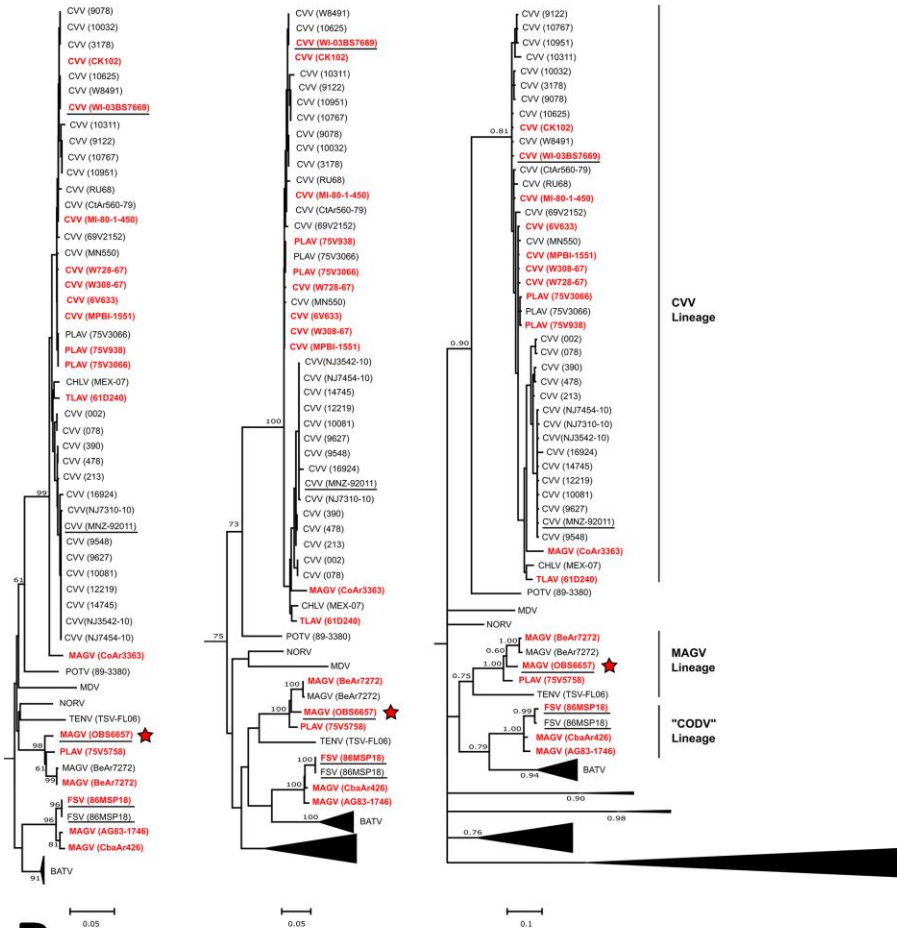**B**

Neighbor-Joining

Maximum Likelihood

Bayesian

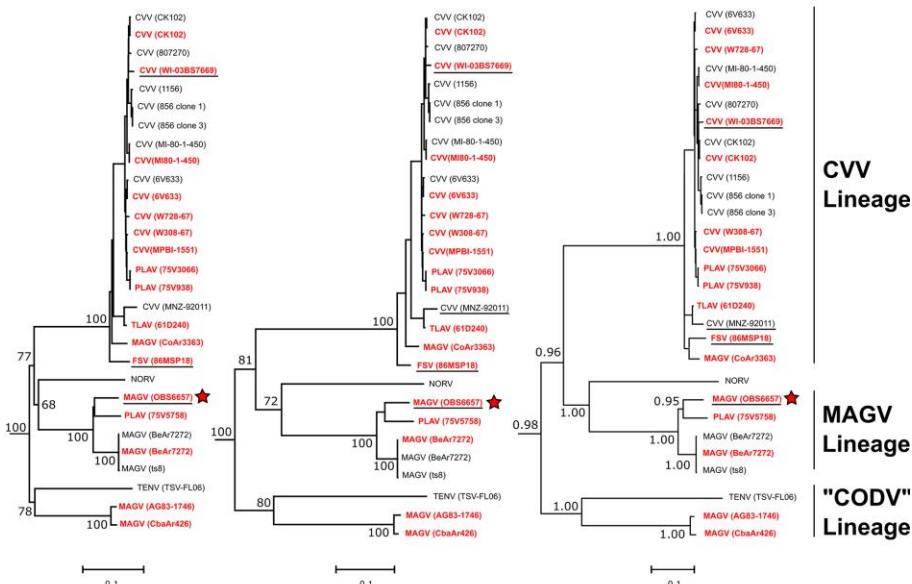

**Technical Appendix Figure 2.** Comparison of phylogenetic analyses of nucleoprotein (A), glycoprotein (B), and polymerase (C) open reading frame nucleotide sequences generated using various phylogenetic methods and models. Neighbor-joining trees for all 3 segments were generated using uniform rates. Maximum-likelihood trees were constructed based on the best fitting model for each dataset (i.e. N = T92+G; GPC and L= GTR+G+I). Bootstrap values for both of these methods were based on 1,000 replicates and are indicated if >60. Analysis by Bayesian inference also used the best fitting model for each dataset (i.e., N = GTR+G; GPC and L = GTR+G+I) and shows posterior probability values >0.60. For clarity, only the portion of the tree containing the sequences generated in this study (i.e., CVV, MAGV, and CODV lineages) are shown, and measures of statistical support for branching within the CVV lineage are omitted. Sequences generated in this study are shown in red and are bold. The OBS6657 isolate is indicated with a red star, and human-derived isolates are underlined. BATV, Batai virus; CVV, Cache Valley virus; CHLV, Cholul virus; CODV, Córdoba virus; FSV, Fort Sherman virus; MAGV, Maguari virus; MDV, Main Drain virus; NORV, Northway virus, PLAV, Playas virus; POTV, Potosi virus; TLAV, Tlacotalpan virus; TENV, Tensaw virus.







**Technical Appendix Figure 3.** Divergence analyses for nucleoprotein (A), glycoprotein (B), and polymerase (C) sequences. Nucleotide (top) and amino acid (bottom) sequences of MAGVs (blue) and CVVs (purple) and for other closely related reference sequences (gray). Amino acid identities among members of the same group are highlighted in dark shades of the corresponding colors. Although in the analysis of the nucleoprotein sequence all pairings showed identity values >90%, in the polymerase sequence analysis pairing outside of a clade that showed identity values >90% are highlighted in red. D) Recombination analysis. Concatenated full-length genomes for all members of the CVV, MAGV, and CODV lineages with available data were generated and analyzed for evidence of recombination using RDP4 Beta 4.83 (1). A single recombination event (equivalent to reassortment in the segmented virus) was identified and corresponded to the M segment junctions in the concatemer. The major parent (i.e., S and L segment donor) was identified as being most closely related to CODV strain CbaAr426 (shown in green), and the minor parent (i.e., M segment donor) was most closely related to CVV strain CoAr3363 (shown in blue). BATV, Batai virus; CVV, Cache Valley virus; CODV, Córdoba virus; FSV, Fort Sherman virus; MAGV, Maguari virus; NORV, Northway virus; PLAV, Playas virus; TLAV, Tlacotalpan virus; TENV, Tensaw virus.

## Reference

1. Martin DP, Murrell B, Golden M, Khoosal A, Muhire B. RDP4: Detection and analysis of recombination patterns in virus genomes. *Virus Evol.* 2015;1:vev003. **PMID: 27774277**
